# Supplementary material
Source: PubMed Central journal article supplement (PMC5985402)
Supplement: mmc1.pdf [file mmc1.pdf]

The American Journal of Human Genetics, Volume 102

## Supplemental Data

### Reccurrent *F8* Intronic Deletion Found in Mild Hemophilia A Causes *Alu* Exonization

Yohann Jourdy, Alexandre Janin, Mathilde Fretigny, Anne Lienhart, Claude Négrier, Dominique Bozon, and Christine Vinciguerra

## Supplemental data

**Table S1: Primers used for *F8* RT-PCR analysis.**

| Primer pair     | Forward primer |                        | Reverse primer |                              | Product size, bp |
|-----------------|----------------|------------------------|----------------|------------------------------|------------------|
|                 | Exonic site    | Sequence               | Exonic site    | Sequence                     |                  |
| A               | 1              | CTTTGCGATTCTGCTTTAG    | 9              | GCTGAGGGCCATTGTTCAAA         | 1273             |
| A1              | 1              | CTTTGCGATTCTGCTTTAG    | 5-6            | GAGTGCCAACITTTCCCTTCAT       | 650              |
| A2              | 5              | AAGGAAAAGACACAGACCTT   | 7-8            | TCATGTTGGTGGGAAGAGATA        | 398              |
| B               | 7              | TTACTGCTCAAACACTCTTG   | 14             | TCATATTTGGCTTCTTGGAG         | 1561             |
| B1              | 7              | TTACTGCTCAAACACTCTTG   | 11             | AGTTGGCCCATCTTCTACAGTCACTGTC | 686              |
| B2 <sup>a</sup> | 13             | TGCCTGACCCGCTATTACTC   | 14             | AGAAGCTTCTTGGTTCAATG         | 645              |
| C               | 14             | GATACCATTTTGTCCCTGAA   | 22             | ACATGATGATAAACTGAGAGA        | 1528             |
| C1              | 14             | GATACCATTTTGTCCCTGAA   | 17             | CATGGAAGCGATAAT              | 973              |
| C2              | 17             | AAAATATGGAAAGAAACTGC   | 22             | ACATGATGATAAACTGAGAGA        | 636              |
| D               | 19             | CCTTATTGGCGAGCATCTACA  | 3'UTR          | TTGCCTAGTTATATTGGAAG         | 1254             |
| D1              | 22             | TTATTCACGGCATCAAGACCC  | 23             | AAATCACAGCCCATCAACTCC        | 274              |
| D2              | 23             | CTCCAATTATTGCTCGATACAT | 25             | CTGGTAAGCAGAGATTTTAC         | 337              |
| D3 <sup>a</sup> | 24             | GCCATTGGGAATGGAGAGTA   | 3'UTR          | AGTTAATTCAGGAGGCTTCA         | 606              |

Reverse primers of pairs A, B, C and D are used for the reverse transcription; Primer pairs A, B, C and D are used for the first PCRs; Primer pairs A1, A2, B1, B2, C1, C2, D1, D2, D3 are used for the second nested PCRs. <sup>a</sup> Primers previously published by el-Maarri *et al.*<sup>22</sup>

**Table S2: Primers used for *F8* intron 13 amplification and sequencing and for making *F8* exon 13 minigene construct**

| Primer pair | Forward primer site | Forward primer                                      |                  | Reverse primer                                      |      | Product size, bp |
|-------------|---------------------|-----------------------------------------------------|------------------|-----------------------------------------------------|------|------------------|
|             |                     | Sequence                                            | site             | Sequence                                            | site |                  |
| E           | Intron 12 (-202)    | TGGTTTATGACTGTCTCCTCACA                             | Intron 13 (+770) | GCTGAGGGCCATGTTCAAA                                 |      | 1182             |
| F           | Exon 13             | AGCATTGGAGCACAGACTGA                                | Intron 13 (+675) | AGACCATCCTGGCTAACACG                                |      | 810              |
| G           | Intron 12 (-202)    | <i>CTAAACAGCCACATATGTGGTTTA</i><br>TGACTGTCTCCTCACA | Intron 13 (+770) | <i>CCCCCTCGACCATATGCAAAAGAA</i><br>GACATTCAGGCTGGGC |      | 1182             |

Primer pair E are used for the amplification reaction; Primer pair F are used for the sequencing; Primer pair G are used for making minigene construct. Sequences in italic correspond to specific tail required for in-fusion reaction.

**Table S3. Description of *F8* intragenic markers used in this study**

| Marker   | Genomic position (hg38)      | Type of repeat    |
|----------|------------------------------|-------------------|
| STR 1    | chrX:155,002,613-155,002,646 | (CA) <sub>n</sub> |
| STR 9    | chrX:154,964,082-154,964,109 | (CA) <sub>n</sub> |
| STR 13   | chrX:154,935,982-154,936,024 | (AC) <sub>n</sub> |
| STR 22   | chrX:154,875,737-154,875,774 | (GT) <sub>n</sub> |
| STR 25 A | chrX:154,850,084-154,850,120 | (TG) <sub>n</sub> |
| STR 25 B | chrX:154,854,591-154,854,619 | (TG) <sub>n</sub> |

**Table S4: Primers used for intragenic markers analysis**

| Primer pair  | Sequence of forward primer | Sequence of reverse primer |
|--------------|----------------------------|----------------------------|
| STR1         | TTGCAAATGTACAATAGGGCAGT    | TTCTTGGTCTGCCTTCTGA        |
| STR9         | TGGACTTCCAACCCCATAGTC      | CACCATGCCTGGCTAATTCA       |
| STR13        | TGCATCACTGTACATATGTATCTT   | CCAAATTACATATGAATAAGCC     |
| STR22        | TTCTAAGAATGTAGTGTGTGTG     | TAATGCCACATTATAGA          |
| STR25A       | AGATCGCGCCATCACATTC        | AGGGGTAGGCAGGCTTGTTT       |
| STR25B       | CAGAACCAATTCCAGAAATCCA     | GCTCTCTGGGGTCTCTAGGC       |
| F8_del_IVS13 | CTGGAGTGAAATATCTCATTGTGC   | AAAATTAGCTGGGTGTGGTGG      |

Reverse primers are labeled by FAM
